# Supplementary material for: pyconsFold: a fast and easy tool for modeling and docking using distance predictions
Source: Oxford University Press journal article supplement (doi:10.1093/bioinformatics/btab353), 2021-05-06
Supplement: btab353_supplementary_data.pdf [file btab353_supplementary_data.pdf]

# pyconsFold: Supplemental Notes

Lamb J., Elofsson A.

## 1 Installation

pyconsFold requires a working installation of CNS. This needs to be done manually due to license.

### 1.1 CNS

1. Request a download link from CNS.
2. Follow the emailed instructions to download  
`cns_solve_1.3_all_intel_mac_linux.tar.gz`
3. Extract the files  
`tar xzvf cns_solve_1.3_all_intel_mac_linux.tar.gz`
4. Change into the resulting directory  
`cd cns_solve_1.3`
5. Unhide the bash-specific file  
`mv .cns_solve_env_sh cns_solve_env.sh`
6. In this resulting file, replace `_CNSsolve_location_` with the CNS installation folder. If you extracted the file in your home folder then the CNS installation would be:  
`/home/<your username>/cns_solve_1.3`
7. Source CNS, source `cns_solve_env.sh`<sup>1</sup>, to make this permanent and to prevent you having to do this every time, add it to your `.bashrc` file.
8. Test CNS by going into the test folder `cd test` and run the tests  
`../bin/run_tests -tidy *.inp`

### 1.2 pyconsFold

1. Run:  
`pip3 install pyconsFold`  
It is recommended to run a separate python environment for pyconsFold, ie `virtualenv`.

---

<sup>1</sup>If you get an error about `csh` interpreter, you need to install `csh`

## 2 Examples

### 2.1 Distance modelling

Distance modelling is done using a contacts file with predicted distances and errors.

```
import pyconsFold
pyconsFold.model_dist(fasta_file , contact_file ,
                      output_directory)
```

### 2.2 Classical modelling

Classical model is done by treating the contacts file as binary contacts and using a static distance and error. This means a contacts file with predicted distances can be used as input but the program will treat the contacts as static contacts with the same distance and error.

```
import pyconsFold
pyconsFold.model(fasta_file , contact_file ,
                 output_directory)
```

### 2.3 Docking modelling

Docking requires a contacts file with both inter and intra contacts between the two proteins. If no inter contacts are found, a warning is generated and an artificial contact is created between the centers of the two proteins to prevent the program from failing. Either predicted distances or classical contacts can be used, see the dist parameter.

```
import pyconsFold
pyconsFold.model_dock(first_fasta_file ,
                      second_fasta_file ,
                      contact_file , output_directory)
```

Further examples and use of advanced parameters can be found in in "examples/examples.py" in the github repository.

## 3 Arguments

Multiple optional arguments are available. The following are the most commonly used. For a full list, see the github repository.

```
rr_pthres -- Threshold for the confidence we
           want in a prediction (default
           model(0.80), model_dist(0.45),
           model_dock(0.50))
```

```

rr_sep      -- Separation between contacts
             (default 0)
save_step   -- Save working steps
             (default False)
stage2      -- Run stage2, filter contacts vs
             generated structure and generate
             new structures with filtered
             contacts (default False)
debug       -- Write out debug information
             (default False)
selectrr    -- How many contacts to use?
             Can be "all", "#L", or #.
             (default "all")
mcount      -- How many models to generate?
             (default 20)
top_models  -- How many of the generated
             models should be ranked and
             saved? (default 20)
use_angles  -- If predicted angels should be
             used, only works with npz
             (default False)
omega       -- RR-formated file with omega
             angles (if npz are not used)
             (default '')
theta       -- RR-formated file with theta
             angles (if npz are not used)
             (default '')

```

## 4 Arguments

QA-function arguments to all above functions:

- pcons (default False) – If set to true, gives pcons scores for all models (using either pcons installed in the PATH or the builtin binary)
- tmscore\_pdb\_file – If a structure file is supplied, runs all models against this (presumed) native structure and reports the TMscore (using either TMscore in the PATH or builtin binary)

## 5 Extras

```

from pyconsFold.utils import npz_to_casp, pdb_to_npz

npz_to_casp("trRosetta.npz")  ## Converts trRosetta
                               ## distance and angle

```

```

                                ## predictions to CASP
                                ## format in separate files

pdb_to_npz("structure.pdb") ## Converts a structure
                             ## (pdb/mmCif) to trRosetta
                             ## distances and angles,
                             ## useful when
                             ## investigating how well
                             ## a model conforms to
                             ## restraints

```

## 6 Adjustable parameters for CNS, advanced

```

rrtype      -- Between which atoms in a residue are the contacts?
              (default 'cb')
lbd         -- Lambda, 0.1-10 (default 0.4)
contwt      -- Contact restraint weights, 0.1-10000 (default 10)
sswt        -- Secondary structure weights, 0.1-100 (default 5)
bin_values  -- Dictionary of bin_values for conversion of npz to
              RR-format, see source code (default {})

```

## 7 Benchmark & Data

Three datasets has been tested: PconsC3 (see github repository and Figure S1) and CASP13 (see Table S1) on individual chains. The docking was benchmarked on all 222 heterodimeric pairs from Dockground 4.3 (see Figure 1 in the main text).

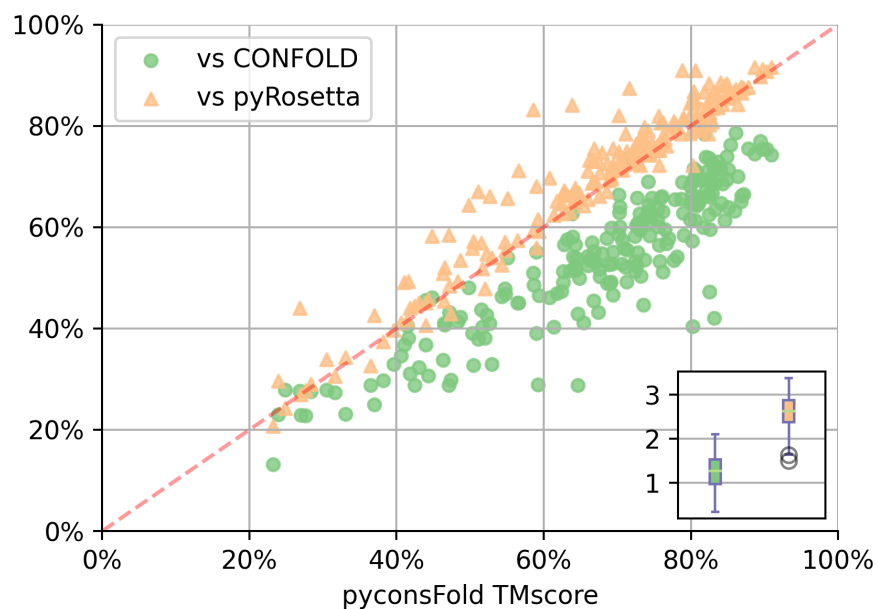

Figure S1: pyRosetta, pyconsFold and CONFOLD models on the PconsC3 dataset. pyconsFold against both contact based CONFOLD (green circles) and pyRosetta (orange triangles) models. pyRosetta and CONFOLD TMscores are on the y-axis while the pyconsFold distance based TMscores are on the x-axis. pyconsFold predictions outperforms CONFOLD in almost all cases. pyconsFolds models perform almost as well as pyRosetta but is around 20 times (more than 1 order of magnitude) faster per model as the inset shows(log10 scale of per model time in seconds). pyconsFold in green and pyRosetta in orange.

| <b>Target</b> | <b>trRosetta</b> | <b>pyconsFold</b> | <b>CONFOLD</b> |
|---------------|------------------|-------------------|----------------|
| <b>T0950</b>  | 0.6358           | 0.2994            | 0.1519         |
| <b>T0951</b>  | 0.8598           | 0.8625            | 0.3305         |
| <b>T0952</b>  | 0.5357           | 0.4673            | 0.1487         |
| <b>T0954</b>  | 0.7830           | 0.7172            | 0.1554         |
| <b>T0955</b>  | 0.5155           | 0.4978            | 0.2023         |
| <b>T0958</b>  | 0.6107           | 0.6072            | 0.2113         |
| <b>T0960</b>  | 0.2394           | 0.2209            | 0.1794         |
| <b>T0961</b>  | 0.8398           | 0.7378            | 0.2139         |
| <b>T0963</b>  | 0.1977           | 0.2124            | 0.1965         |
| <b>T0965</b>  | 0.7989           | 0.7873            | 0.2583         |
| <b>T0966</b>  | 0.3328           | 0.2307            | 0.1615         |
| <b>T0967</b>  | 0.7570           | 0.7322            | 0.2396         |
| <b>T0969</b>  | 0.7750           | 0.4528            | 0.2781         |
| <b>T0970</b>  | 0.4651           | 0.4304            | 0.1486         |
| <b>T0971</b>  | 0.8939           | 0.3275            | 0.2922         |
| <b>T0976</b>  | 0.5043           | 0.3257            | 0.1585         |
| <b>T0982</b>  | 0.4766           | 0.4574            | 0.1815         |
| <b>T0983</b>  | 0.8713           | 0.7956            | 0.2940         |
| <b>T0984</b>  | 0.2563           | 0.2050            | 0.0931         |
| <b>T0987</b>  | 0.3546           | 0.3728            | 0.1763         |
| <b>T0990</b>  | 0.5148           | 0.3018            | 0.1004         |
| <b>T0996</b>  | 0.2398           | 0.2064            | 0.1444         |
| <b>T1000</b>  | 0.7847           | 0.6588            | 0.2922         |
| <b>T1003</b>  | 0.7998           | 0.5490            | 0.3410         |
| <b>T1005</b>  | 0.6684           | 0.6396            | 0.3207         |
| <b>T1006</b>  | 0.8824           | 0.8652            | 0.2824         |
| <b>T1008</b>  | 0.3731           | 0.3866            | 0.1698         |
| <b>T1009</b>  | 0.7825           | 0.7791            | 0.2012         |
| <b>T1010</b>  | 0.2961           | 0.2908            | 0.1328         |
| <b>T1011</b>  | 0.4929           | 0.2688            | 0.1303         |
| <b>T1016</b>  | 0.8756           | 0.8633            | 0.3255         |
| <b>T1018</b>  | 0.8569           | 0.8600            | 0.2320         |

Table S1: TMscore for models generated with the trRosetta, distance based pyconsFold and contact based classic CONFOLD. There is a clear difference between the binary contact based CONFOLD and the distance based trRosetta and pyconsFold.
